# Supplementary material for: A Spatial Analysis of Pedestrian Accident and Walkable Greenway Street Networks in a Rapidly Growing Mid-Size City: A Case Study of Nashville, Tennessee
Source: Research Square preprint supplement (doi:10.21203/rs.3.rs-7810040/v1), 2025-10-27
Supplement: Supplementary file 2 [file 92787f6df1a4d17d63e139be.xlsx]

## Sheet: Sheet3
Greenway_ID	Greenway	YearBuilt	HH_Median_Income_Max	Log_HH_Median_Income_Max	SUM_AADT	Mean_AADT_31_6_26	Log_AADT	MIN_SPD_LMT	MAX_SPD_LMT	MEAN_SPD_LMT	MEDIAN_SPD_LMT	SUM_Total_Popu	GW_Buffer_Length(mi)	GW_Bu_Area (SqMi)	Pedes_Proxy_Volume	Accident_COUNT	Log_Acciddent_Count	SUM_Number_of_Injuries	SUM_Number_of_Fatalities	Log_Mean_SPD_Limit	Log_Proxy_Ped_Volume	Greenway_Length_Category	Log_GW_Length
105	Mill Creek Greenway	2013	48750	10.7945	156482	120895	11.9607	0	55	6.875	0	11999	0.661091	181.752	66	1	0	0	2	1.92789	4.18966	Other	-0.413865
116	Gulch Greenway	2015	94620	11.4576	33622	120895	10.4229	0	35	20	30	2915	0.679511	190.954	15	2	0.693147	2	0	2.99573	2.70805	Short	-0.386382
28	Cumberland River Greenway	2008	87616	11.3807	217752	120895	12.2911	30	55	45	55	10470	0.692294	199.869	52	1	0	4	1	3.80666	3.95124	Short	-0.367744
162	Gulch Greenway	2019	98621	11.499	120895	120895	11.7027	0	30	6	0	6957	0.699044	200.761	35	1	0	1	0	1.79176	3.55535	Short	-0.358041
126	Cumberland River Greenway	2015	93019	11.4406	68217	120895	11.1304	0	30	26.6667	30	21404	0.78647	254.558	84	5	1.60944	5	0	3.28341	4.43082	Short	-0.240201
14	Richland Creek Greenway	2006	68681	11.1372	53572	120895	10.8888	0	40	26.6667	40	3496	0.867689	287.103	12	1	0	1	0	3.28341	2.48491	Short	-0.141922
122	Seven Mile Creek Greenway	2013	58333	10.9739	74584	120895	11.2197	0	40	30	35	7422	0.9505	373.759	20	9	2.19722	8	1	3.4012	2.99573	Short	-0.050767
161	Gulch Greenway	2019	34444	10.4471	42506	120895	10.6574	0	30	8.57143	0	10342	0.969939	345.971	30	5	1.60944	5	0	2.14843	3.4012	Short	-0.030522
75	Seven Mile Creek Greenway	2008	52750	10.8733	108525	120895	11.5947	0	40	18	15	6754	1.05047	382.292	18	5	1.60944	6	0	2.89037	2.89037	Short	0.04924
11	Mill Creek Greenway	2002	83568	11.3334	24976	120895	10.1257	0	45	21.6667	20	7378	1.06361	448.983	16	4	1.38629	4	0	3.07578	2.77259	Short	0.061673
61	Mill Creek Greenway	2001	47734	10.7734	95871	120895	11.4708	0	45	28.75	40	10248	1.10285	427.464	24	1	0	1	0	3.35864	3.17805	Medium	0.097897
108	Richland Creek Greenway	2014	86914	11.3727	130554	120895	11.7795	0	55	23.4	30	9286	1.189	469.555	20	1	0	1	0	3.15274	2.99573	Medium	0.173109
73	Seven Mile Creek Greenway	2008	57039	10.9515	43014	120895	10.6693	0	40	29	35	10790	1.18931	446.257	24	1	0	1	0	3.3673	3.17805	Medium	0.173373
103	Mill Creek Greenway	2013	48750	10.7945	469446	120895	13.0593	0	55	11.9565	0	23710	1.25093	529.814	45	1	0	0	2	2.48128	3.80666	Medium	0.223885
143	Mill Creek Greenway	0	94289	11.4541	120895	120895	11.7027	0	40	11.6667	0	26766	1.27446	490.207	55	1	0	1	0	2.45674	4.00733	Medium	0.242521
2	Cumberland River Greenway	2005	80313	11.2937	120895	120895	11.7027	45	45	45	45	3759	1.30275	509.107	7	1	0	1	0	3.80666	1.94591	Medium	0.264479
125	Cumberland River Greenway	2015	93019	11.4406	168938	120895	12.0373	0	40	26.3333	30	27553	1.33866	559.664	49	13	2.56495	14	0	3.27084	3.89182	Medium	0.291671
72	Richland Creek Greenway	2010	57039	10.9515	120895	120895	11.7027	0	30	15	15	18015	1.34658	527.61	34	1	0	1	0	2.70805	3.52636	Medium	0.297565
19	Cumberland River Greenway	2001	93019	11.4406	150340	120895	11.9207	0	40	20.3571	30	25150	1.40874	555.599	45	39	3.66356	34	0	3.01343	3.80666	Medium	0.342692
123	Mill Creek Greenway	2015	89781	11.4051	120895	120895	11.7027	0	30	8	0	12321	1.43203	681.632	18	1	0	1	0	2.07944	2.89037	Medium	0.359096
9	Gulch Greenway	2010	98621	11.499	105914	120895	11.5704	0	35	14.8148	0	12385	1.49975	615.166	20	31	3.43399	31	2	2.69563	2.99573	Medium	0.405301
4	Cumberland River Greenway	2013	93019	11.4406	51798	120895	10.8551	0	40	23	35	12187	1.55012	642.369	19	2	0.693147	3	0	3.13549	2.94444	Medium	0.438335
3	Cumberland River Greenway	2001	98621	11.499	82027	120895	11.3148	0	35	13.0645	15	11929	1.55669	640.723	19	3	1.09861	3	0	2.5699	2.94444	Medium	0.442562
29	Cumberland River Greenway	2008	98621	11.499	93768	120895	11.4486	0	35	19.4444	30	13647	1.75239	728.334	19	3	1.09861	3	0	2.96756	2.94444	Medium	0.560978
13	Richland Creek Greenway	2008	85981	11.3619	18169	120895	9.80747	0	35	16.4583	30	16207	1.95818	884.475	18	1	0	1	0	2.80083	2.89037	Medium	0.672017
21	Stones River Greenway	2000	87222	11.3762	161567	120895	11.9927	0	70	47.1429	40	5906	2.05221	897.495	7	2	0.693147	2	0	3.85318	1.94591	Long	0.718917
142	Browns Creek Greenway	2019	68125	11.1291	68544	120895	11.1352	0	40	25.6667	35	2438	2.2886	1065.07	2	1	0	1	0	3.24519	0.693147	Long	0.827939
7	Cumberland River Greenway	2012	46875	10.7552	78423	120895	11.2699	0	40	18.4615	0	14949	2.43819	1111.63	13	3	1.09861	3	0	2.91569	2.56495	Long	0.891255
138	440 Greenway	2018	94500	11.4564	278978	120895	12.5389	0	55	18.2927	0	12774	2.79931	1279.88	10	3	1.09861	3	0	2.9065	2.30259	Long	1.02937
27	Cumberland River Greenway	2001	98621	11.499	256806	120895	12.4561	0	40	14.4167	0	25076	2.84127	1294.95	19	43	3.7612	39	0	2.66838	2.94444	Long	1.04425
88	Cumberland River Greenway	2004	87616	11.3807	108876	120895	11.598	30	55	42.5	42.5	14013	2.93356	1327.48	11	1	0	4	1	3.7495	2.3979	Other	1.07622

## Sheet: Sheet4
Pedes_Proxy_Volume	Accident_COUNT
66	1
15	2
52	1
35	1
84	5
12	1
20	9
30	5
18	5
16	4
24	1
20	1
24	1
45	1
55	1
7	1
49	13
34	1
45	39
18	1
20	31
19	2
19	3
19	3
18	1
7	2
2	1
13	3
10	3
19	43
11	1

## Sheet: Sheet5
GW_Buffer_Length(mi)	Accident_COUNT
0.661091	1
0.679511	2
0.692294	1
0.699044	1
0.78647	5
0.867689	1
0.9505	9
0.969939	5
1.05047	5
1.06361	4
1.10285	1
1.189	1
1.18931	1
1.25093	1
1.27446	1
1.30275	1
1.33866	13
1.34658	1
1.40874	39
1.43203	1
1.49975	31
1.55012	2
1.55669	3
1.75239	3
1.95818	1
2.05221	2
2.2886	1
2.43819	3
2.79931	3
2.84127	43
2.93356	1

## Sheet: Sheet1
MEAN_SPD_LMT	Accident_COUNT
6.875	1
20	2
45	1
6	1
26.6667	5
26.6667	1
30	9
8.57143	5
18	5
21.6667	4
28.75	1
23.4	1
29	1
11.9565	1
11.6667	1
45	1
26.3333	13
15	1
20.3571	39
8	1
14.8148	31
23	2
13.0645	3
19.4444	3
16.4583	1
47.1429	2
25.6667	1
18.4615	3
18.2927	3
14.4167	43
42.5	1

## Sheet: Sheet2
SUM_AADT	Accident_COUNT
156482	1
33622	2
217752	1
120895	1
68217	5
53572	1
74584	9
42506	5
108525	5
24976	4
95871	1
130554	1
43014	1
469446	1
120895	1
120895	1
168938	13
120895	1
150340	39
120895	1
105914	31
51798	2
82027	3
93768	3
18169	1
161567	2
68544	1
78423	3
278978	3
256806	43
108876	1

## Sheet: Sheet6
HH_Median_Income_Max	Accident_COUNT
48750	1
94620	2
87616	1
98621	1
93019	5
68681	1
58333	9
34444	5
52750	5
83568	4
47734	1
86914	1
57039	1
48750	1
94289	1
80313	1
93019	13
57039	1
93019	39
89781	1
98621	31
93019	2
98621	3
98621	3
85981	1
87222	2
68125	1
46875	3
94500	3
98621	43
87616	1

## Sheet: Sheet8
HH_Median_Income_Max	SUM_Number_of_Injuries
48750	0
94620	2
87616	4
98621	1
93019	5
68681	1
58333	8
34444	5
52750	6
83568	4
47734	1
86914	1
57039	1
48750	0
94289	1
80313	1
93019	14
57039	1
93019	34
89781	1
98621	31
93019	3
98621	3
98621	3
85981	1
87222	2
68125	1
46875	3
94500	3
98621	39
87616	4

## Sheet: Sheet9
Pedes_Proxy_Volume	SUM_Number_of_Injuries
66	0
15	2
52	4
35	1
84	5
12	1
20	8
30	5
18	6
16	4
24	1
20	1
24	1
45	0
55	1
7	1
49	14
34	1
45	34
18	1
20	31
19	3
19	3
19	3
18	1
7	2
2	1
13	3
10	3
19	39
11	4

## Sheet: Sheet10
GW_Buffer_Length(mi)	SUM_Number_of_Injuries
0.661091	0
0.679511	2
0.692294	4
0.699044	1
0.78647	5
0.867689	1
0.9505	8
0.969939	5
1.05047	6
1.06361	4
1.10285	1
1.189	1
1.18931	1
1.25093	0
1.27446	1
1.30275	1
1.33866	14
1.34658	1
1.40874	34
1.43203	1
1.49975	31
1.55012	3
1.55669	3
1.75239	3
1.95818	1
2.05221	2
2.2886	1
2.43819	3
2.79931	3
2.84127	39
2.93356	4

## Sheet: Sheet11
MEAN_SPD_LMT	SUM_Number_of_Injuries
6.875	0
20	2
45	4
6	1
26.6667	5
26.6667	1
30	8
8.57143	5
18	6
21.6667	4
28.75	1
23.4	1
29	1
11.9565	0
11.6667	1
45	1
26.3333	14
15	1
20.3571	34
8	1
14.8148	31
23	3
13.0645	3
19.4444	3
16.4583	1
47.1429	2
25.6667	1
18.4615	3
18.2927	3
14.4167	39
42.5	4

[truncated: 6 more sheets: Sheet12, Sheet13, Sheet14, Sheet15, Sheet16, Sheet17]
